# Supplementary material for: Optimizing water and nitrogen productivity of wheat and triticale across diverse production environments to improve the sustainability of baked products
Source: Frontiers journal article supplement (doi:10.3389/fpls.2022.952303), 2022-09-02
Supplement: Image_1.pdf [file Image_1.pdf]

# **Optimizing water and nitrogen productivity of wheat and triticale across diverse production environments to improve the sustainability of baked products**

Santiago Tamagno<sup>1</sup>, Cameron M. Pittelkow<sup>1</sup>, George Fohner<sup>2</sup>, Taylor S. Nelsen<sup>1</sup>,  
Joshua M. Hegarty<sup>1</sup>, Claudia E. Carter<sup>3</sup>, Teng Vang<sup>3</sup> and Mark E. Lundy<sup>1,4</sup>

<sup>1</sup> Department of Plant Sciences, University of California, Davis, CA 95616, USA

<sup>2</sup> California Grain Foundation, Woodland, CA 95776, USA

<sup>3</sup> California Wheat Commission, Woodland, CA 95776, USA

<sup>4</sup> Division of Agriculture and Natural Resources, University of California, Davis, CA 95618

**Corresponding authors:** [stamagno@ucdavis.edu](mailto:stamagno@ucdavis.edu); [melundy@ucdavis.edu](mailto:melundy@ucdavis.edu)

## **Supplementary material**

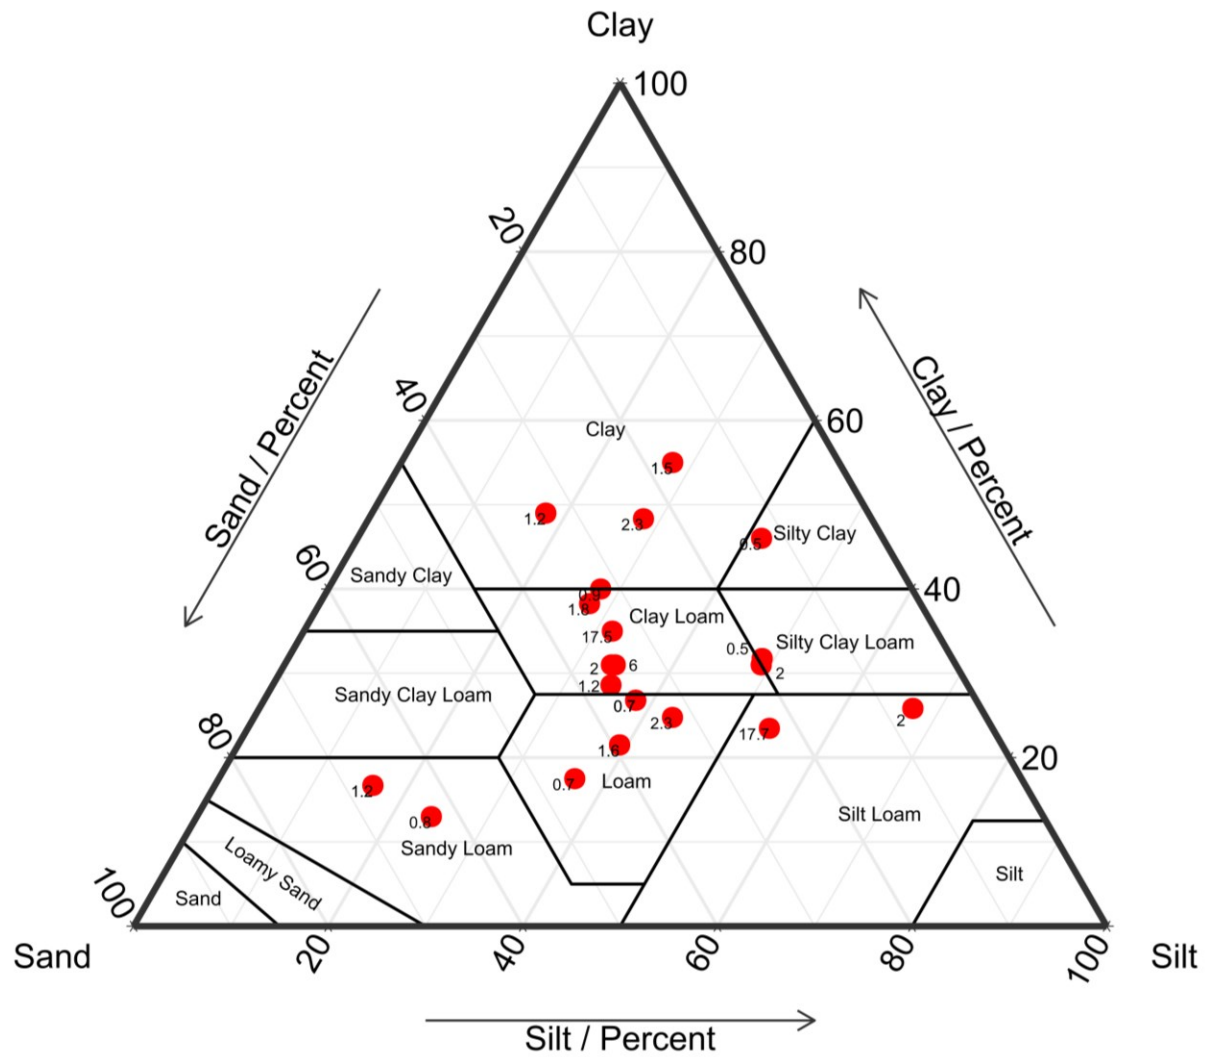

**Supplementary Figure S1:** Soil texture variability in the database, textural groups and organic matter. Each data point represents a site-year in the database. Numbers indicate the organic matter content (%).
